# Supplementary material for: MicroRNA and mRNA Dysregulation in Astrocytes Infected with Zika Virus
Source: Viruses. 2017 Oct 14;9(10):297. doi: 10.3390/v9100297 (PMC5691648; doi:10.3390/v9100297)
Supplement: Supplementary file 1 [file viruses-09-00297-s001.pdf]

## Supplementary Tables

Supplementary Table 1: Fold-change for miRNAs during Zika virus infection.

| miRNA           | 24 hpi | 48 hpi | 72 hpi |
|-----------------|--------|--------|--------|
| hsa-miR-17-5p   | 6.0    | 1.0    | 0.2    |
| hsa-miR-146b-5p | 3.8    | 0.6    | 0.1    |
| hsa-miR-30e-3p  | 3.3    | 1.4    | 0.0    |
| hsa-miR-296-5p  | 2.6    | 0.4    | 0.9    |
| hsa-miR-1303    | 2.6    | 0.3    | 0.7    |
| hsa-miR-4521    | 2.5    | 0.7    | 0.0    |
| hsa-miR-30e-5p  | 2.4    | 0.7    | 0.1    |
| hsa-miR-107     | 2.2    | 1.0    | 0.0    |
| hsa-miR-431-5p  | 2.1    | 1.4    | 0.0    |
| hsa-miR-7-5p    | 2.1    | 1.1    | 0.3    |
| hsa-miR-361-3p  | 2.0    | 1.3    | 0.1    |
| hsa-miR-411-3p  | 1.2    | 2.7    | 0.0    |
| hsa-miR-323a-5p | 0.6    | 2.6    | 1.4    |
| hsa-miR-194-5p  | 0.5    | 2.0    | 0.0    |
| hsa-miR-9-5p    | 1.3    | 1.9    | 7.2    |

Supplementary Table 2: miRNA targets at each time point post infection.

| Hours Post-Infection | miRNA           | No. Potential Genes Targets* | No. Genes after filtering** |
|----------------------|-----------------|------------------------------|-----------------------------|
| 24                   | hsa-miR-17-5p   | 2186                         | 38                          |
|                      | hsa-miR-146b-5p | 501                          | 9                           |
|                      | hsa-miR-30e-3p  | 1052                         | 21                          |
|                      | hsa-miR-296-5p  | 450                          | 10                          |
|                      | hsa-miR-1303    | 221                          | 7                           |
|                      | hsa-miR-4521    | 150                          | 2                           |
|                      | hsa-miR-30e-5p  | 1546                         | 32                          |
|                      | hsa-miR-107     | 2187                         | 32                          |
|                      | hsa-miR-431-5p  | 0                            | 0                           |
|                      | hsa-miR-7-5p    | 1830                         | 38                          |
|                      | hsa-miR-361-3p  | 508                          | 10                          |
| 48                   | hsa-miR-411-3p  | 158                          | 22                          |
|                      | hsa-miR-323a-5p | 103                          | 5                           |
|                      | hsa-miR-194-5p  | 410                          | 45                          |
| 72                   | hsa-miR-9-5p    | 1035                         | 88                          |

\* TarBase v7.0 (p-value threshold = 0.05); \*\* Filtered using downregulated genes at each time point (< or = - 2-fold)

## Supplementary Figures

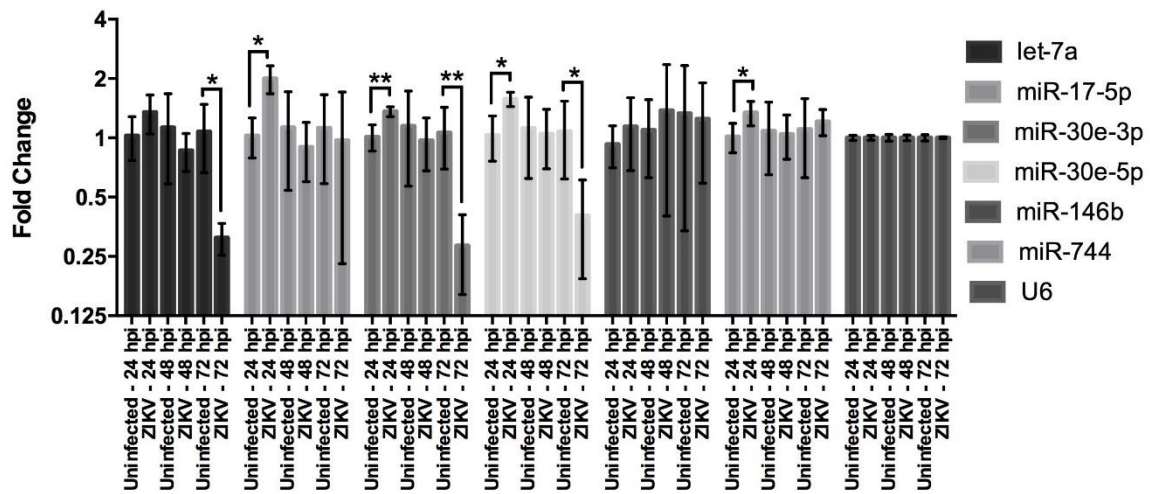

**Supplementary Figure 1:** Quantitative RT-PCR validation (qPCR), was compared to next generation sequencing expression at 24, 48 and 72 hpi. Validation was performed on three biological replicates and error-bars represent standard deviation. Student's t-test was used to assess significance where \* indicates a p-value < 0.05, and \*\* represents a p-value < 0.005 respectively.

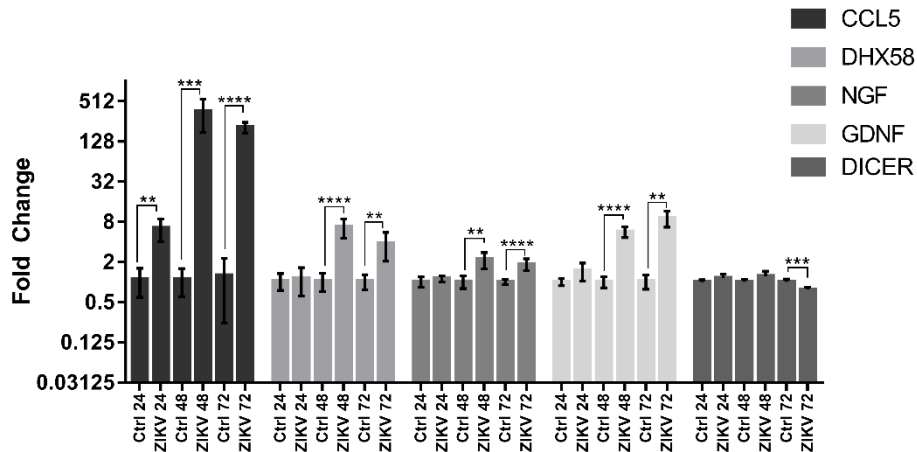

**Supplementary Figure 2:** Gene expression data in SVG cells. Cells were infected at an MOI of 1 and mRNA was collected 24, 48 and 72 hpi. Transcription of the genes was analyzed by quantitative real-time PCR with GAPDH as a housekeeping gene and expressed as a fold-change compared to uninfected cells ( $2^{-\Delta\Delta Ct}$  method). Data represent the mean from three replicate experiments, with error bars showing the standard deviation. Samples were compared using Students t-test with significant differences indicated by \*\* ( $p < 0.01$ ), \*\*\* ( $p < 0.001$ ), \*\*\*\* ( $p < 0.0001$ ).
